# Supplementary material for: Psychosocial Effects of Vitiligo: A Systematic Literature Review
Source: Springer Nature journal article supplement (doi:10.1007/s40257-021-00631-6), 2021-09-23
Supplement: MOESM1 [file 19691254]

# Psychosocial Effects of Vitiligo: A Systematic Literature Review

*Am J Clin Dermatol*

Khaled Ezzedine, MD, PhD,<sup>1</sup> Viktoria Eleftheriadou, MD, PhD,<sup>2</sup> Heather Jones, RN,<sup>3</sup> Kristen Bibeau, PhD, MSPH,<sup>3</sup> Fiona I. Kuo, PhD,<sup>3</sup> Daniel Sturm, PharmD,<sup>3</sup> Amit G. Pandya, MD<sup>4,5</sup>

<sup>1</sup>Department of Dermatology, Henri Mondor University Hospital and Université Paris-Est Créteil Val de Marne, Paris, France, [khaled.ezzedine@aphp.fr](mailto:khaled.ezzedine@aphp.fr); <sup>2</sup>Department of Dermatology, Queen Elizabeth Hospital, Birmingham, UK; <sup>3</sup>Incyte Corporation, Wilmington, DE, USA; <sup>4</sup>Palo Alto Foundation Medical Group, Mountain View, CA, USA; <sup>5</sup>University of Texas Southwestern Medical Center, Dallas, TX, USA

## Supplementary Material

### Table of Contents

|                                                                                                                 |    |
|-----------------------------------------------------------------------------------------------------------------|----|
| <b>Supplementary Appendix 1. Search Strategy</b> .....                                                          | 2  |
| <b>Supplementary Table 1. Characteristics of Studies Reporting Prevalence of Psychosocial Comorbidity</b> ..... | 4  |
| <b>References</b> .....                                                                                         | 18 |

## **Supplementary Appendix 1. Search Strategy**

### **1. PubMed**

vitiligo[TITLE/ABSTRACT/KEYWORD]

AND

("quality of life"[TITLE/ABSTRACT/KEYWORD] OR

burden[TITLE/ABSTRACT/KEYWORD] OR

psychosocial[TITLE/ABSTRACT/KEYWORD] OR

depress\*[TITLE/ABSTRACT/KEYWORD] OR

anxiety[TITLE/ABSTRACT/KEYWORD] OR stigma\*[TITLE/ABSTRACT/KEYWORD]

OR psycholog\*[TITLE/ABSTRACT/KEYWORD] OR

psychiatr\*[TITLE/ABSTRACT/KEYWORD])

AND

English[LANGUAGE]

### **2. EMBASE**

'vitiligo':ti,ab,kw

AND

('quality of life':ti,ab,kw OR 'burden':ti,ab,kw OR 'psychosocial':ti,ab,kw OR

'depress\*':ti,ab,kw OR 'anxiety':ti,ab,kw OR 'stigma\*':ti,ab,kw OR

'psycholog\*':ti,ab,kw OR 'psychiatr\*':ti,ab,kw)

AND

'english':la

NOT

('conference abstract':it OR 'conference paper':it OR 'conference review':it)

### **3. Scopus**

TITLE-ABS-KEY(vitiligo)

AND

TITLE-ABS-KEY("quality of life" OR burden OR psychosocial OR depress\* OR anxiety OR stigma\* OR psycholog\* OR psychiatr\*)

AND

(LIMIT-TO(LANGUAGE, "English"))

AND

(LIMIT-TO(SRCTYPE, "j"))

AND

(LIMIT-TO(DOCTYPE, "ar") OR LIMIT-TO(DOCTYPE, "re") OR LIMIT-TO(DOCTYPE, "le"))

### **4. Cochrane Database**

Title/abstract/keyword (vitiligo)

AND

Title/abstract/keyword ("quality of life" OR burden OR psychosocial OR depress\* OR anxiety OR stigma\* OR psycholog\* OR psychiatr\*)

**Supplementary Table 1. Characteristics of Studies Reporting Prevalence of Psychosocial Comorbidity**

| <b>Psychosocial Comorbidity</b>                  | <b>Reference</b>      | <b>Country</b> | <b>Number of Patients With Vitiligo</b> | <b>Age, Mean (SD), y</b>           | <b>Prevalence, %</b>                                    | <b>Comorbidity Screening Tool<sup>a</sup></b> | <b>P Value vs Healthy Controls</b> |
|--------------------------------------------------|-----------------------|----------------|-----------------------------------------|------------------------------------|---------------------------------------------------------|-----------------------------------------------|------------------------------------|
| Depression or depressive disorders<br>Depression | Agarwal 1998 [1]      | United Kingdom | 154                                     | 42 (18)                            | 20–25                                                   | Self-report                                   | NR                                 |
|                                                  | Ajose 2014 [2]        | Nigeria        | 102                                     | 35.9 (13.7)                        | Yes, 7.8; borderline, 21.6                              | HADS                                          | NR                                 |
|                                                  | AlGhamdi 2010 [3]     | Saudi Arabia   | 164                                     | 27 (13)                            | 54                                                      | Self-report                                   | NR                                 |
|                                                  | Al-Harbi 2013 [4]     | Saudi Arabia   | 308                                     | 27 (14.5)                          | 54.5                                                    | BDI                                           | NR                                 |
|                                                  | Alharbi 2020 [5]      | Saudi Arabia   | 308                                     | 27 (14.5)                          | overall, 54.5; mild, 52.4; moderate, 33.3; severe, 14.4 | BDI                                           | NR                                 |
|                                                  | AlShahwan 2015 [6]    | Saudi Arabia   | 64                                      | NR (adults)                        | 14.1                                                    | HADS                                          | NR                                 |
|                                                  | Arýcan 2008 [7]       | Turkey         | 113                                     | Female, 29.2 (NR); male, 33.4 (NR) | 32.7                                                    | Diagnosed during screening                    | NR                                 |
|                                                  | Chan 2013 [8]         | Singapore      | 222                                     | 48.4 (14.9)                        | 16.2                                                    | CES-D                                         | NR                                 |
|                                                  | Chan 2012 [9]         | Singapore      | 145                                     | 47.4 (15.0)                        | 17.2                                                    | CES-D                                         | NR                                 |
|                                                  | Choi 2010 [10]        | South Korea    | 57                                      | 15.4 (1.8)                         | 22.8                                                    | CES-D                                         | NR                                 |
|                                                  | Dabas 2020 [11]       | India          | 95                                      | NR (adults)                        | 14.7 <sup>b</sup>                                       | PRIME-MD PHQ                                  | NR                                 |
|                                                  | Hamidizadeh 2020 [12] | Iran           | 100                                     | 34.5 (12.2)                        | 47.0                                                    | BDI                                           | 0.16                               |

| <b>Psychosocial Comorbidity</b> | <b>Reference</b>          | <b>Country</b>  | <b>Number of Patients With Vitiligo</b> | <b>Age, Mean (SD), y</b>             | <b>Prevalence, %</b> | <b>Comorbidity Screening Tool<sup>a</sup></b> | <b>P Value vs Healthy Controls</b> |
|---------------------------------|---------------------------|-----------------|-----------------------------------------|--------------------------------------|----------------------|-----------------------------------------------|------------------------------------|
|                                 | Henning 2020 [13]         | United States   | 102                                     | NR                                   | 9.2                  | Diagnosis on file                             | NR                                 |
|                                 | Karelson 2013 [14]        | Estonia         | 54                                      | 36.6 (NR)                            | 20.4                 | ES-Q                                          | NR                                 |
|                                 | Kosaraju 2015 [15]        | India           | 6                                       | NR                                   | 50.0                 | PHQ-9                                         | NR                                 |
|                                 | Kota 2019 [16]            | India           | 150                                     | NR (adults)                          | 44.0                 | QIDS-SR-16                                    | NR                                 |
|                                 | Krüger 2011 [17]          | Germany, Jordan | 167                                     | 42.8 (NR)                            | 30.3                 | BDI                                           | NR                                 |
|                                 | Mattoo 2001 [18]          | India           | 113                                     | 30.1 (12.5)                          | 4.4                  | Diagnosed during screening                    | NR                                 |
|                                 | Mattoo 2002 [19]          | India           | 113                                     | 30.1 (12.5)                          | 2.7                  | Diagnosed during screening                    | NR                                 |
|                                 | Morales-Sanchez 2017 [20] | Mexico          | 150                                     | 38 (20)                              | 34.0                 | BDI                                           | NR                                 |
|                                 | Porter 1987 [21]          | United States   | 326                                     | Median (range), 34 (4–79)            | 6.4                  | Self-report                                   | NR                                 |
|                                 | Pun 2021 [22]             | Nepal           | 22                                      | 38.7 (3.2)                           | 18.2                 | VIS                                           | NR                                 |
|                                 | Raikhy 2017 [23]          | India           | 53                                      | NR (adults)                          | 47.2                 | Diagnosed during screening                    | NR                                 |
|                                 | Sampogna 2008 [24]        | Italy           | 181                                     | 35 (NR)                              | 30.9                 | Skindex-29                                    | NR                                 |
|                                 | Sangma 2015 [25]          | India           | 100                                     | 29.7 (7.0)                           | 59.0                 | HDRS                                          | <0.001                             |
|                                 | Sarkar 2018 [26]          | India           | 61                                      | 43.8 (12.5)                          | 62.3                 | Skindex-61                                    | <0.0001                            |
|                                 | Sarma 2020 [27]           | India           | 3962                                    | 30.1 (18.0)                          | 18.8–24.5            | Self-report                                   | <0.001                             |
|                                 | Sawant 2019 [28]          | India           | 100                                     | Men, 35.8 (14.2); women, 36.9 (14.2) | 52.0                 | BDI                                           | NR                                 |

| <b>Psychosocial Comorbidity</b> | <b>Reference</b>      | <b>Country</b> | <b>Number of Patients With Vitiligo</b> | <b>Age, Mean (SD), y</b>    | <b>Prevalence, %</b>                               | <b>Comorbidity Screening Tool<sup>a</sup></b> | <b>P Value vs Healthy Controls</b> |
|---------------------------------|-----------------------|----------------|-----------------------------------------|-----------------------------|----------------------------------------------------|-----------------------------------------------|------------------------------------|
|                                 | Sharma 2001 [29]      | India          | 30                                      | NR (adults)                 | 10.0                                               | Diagnosed during screening                    | NR                                 |
|                                 | Silpa-Archa 2020 [30] | Thailand       | 104                                     | 41.6 (15.9)                 | Overall, 37.5; mild, 24.0; moderate or worse, 13.5 | PHQ-9                                         | NR                                 |
|                                 | Sorour 2017 [31]      | Egypt          | 108                                     | NR                          | 46.3                                               | Diagnosed during screening                    | NR                                 |
|                                 | Topal 2016 [32]       | Turkey         | 100                                     | 35.4 (14.3)                 | 12.0                                               | IPQ                                           | NR                                 |
|                                 | Tsintsadze 2015 [33]  | Georgia        | 15                                      | NR (adolescents and adults) | 60.0                                               | HADS                                          | NR                                 |
|                                 | Yamamoto 2011 [34]    | Japan          | 54                                      | NR                          | 27.8                                               | CES-D                                         | NR                                 |
| Bipolar disorder                | Chen 2020 [35]        | Taiwan         | 1432                                    | Median, 47.1                | 0.1                                                | Diagnosis on file                             | 0.87                               |
|                                 | Raikhy 2017 [23]      | India          | 53                                      | NR (adults)                 | 7.6                                                | Diagnosed during screening                    | NR                                 |
| Dysthymic disorder              | Balaban 2011 [36]     | Turkey         | 42                                      | 39.7 (12.9)                 | 4.8                                                | SCID-I                                        | NR                                 |
|                                 | Mattoo 2001 [18]      | India          | 113                                     | 30.1 (12.5)                 | 1.8                                                | Diagnosed during screening                    | NR                                 |
|                                 | Mattoo 2002 [19]      | India          | 113                                     | 30.1 (12.5)                 | 0.9                                                | Diagnosed during screening                    | NR                                 |
|                                 | Sukan 2007 [37]       | Turkey         | 50                                      | 35.8 (12.6)                 | 26.0                                               | SCID-I                                        | 0.037                              |
| MDD                             | Ahmed 2007 [38]       | India          | 100                                     | 24.6 (NR)                   | 15.0                                               | PAS                                           | NR                                 |

| <b>Psychosocial Comorbidity</b> | <b>Reference</b>                                | <b>Country</b>     | <b>Number of Patients With Vitiligo</b> | <b>Age, Mean (SD), y</b>           | <b>Prevalence, %</b> | <b>Comorbidity Screening Tool<sup>a</sup></b> | <b>P Value vs Healthy Controls</b> |    |
|---------------------------------|-------------------------------------------------|--------------------|-----------------------------------------|------------------------------------|----------------------|-----------------------------------------------|------------------------------------|----|
| Unspecified depressive disorder | Balaban 2011 [36]                               | Turkey             | 42                                      | 39.7 (12.9)                        | 14.3                 | SCID-I                                        | NR                                 |    |
|                                 | Chen 2020 [35]                                  | Taiwan             | 1432                                    | Median, 47.1                       | 3.5                  | Diagnosis on file                             | 0.05                               |    |
|                                 | Dabas 2020 [11]                                 | India              | 95                                      | NR (adults)                        | 10.5                 | PRIME-MD PHQ                                  | NR                                 |    |
|                                 | Ramakrishna 2014 [39]                           | India              | 53                                      | NR                                 | 56.6                 | HDRS                                          | NR                                 |    |
|                                 | Vallerand 2019 [40]                             | United Kingdom     | 7104                                    | Median (IQR), 37.7 (15.8)          | 6.5                  | Diagnosis on file                             | NR                                 |    |
|                                 | Ucuz 2021 [41]                                  | Turkey             | 30                                      | Mean (range), 12.3 (8–17)          | 23.4                 | K-SADS-PL                                     | <0.001                             |    |
|                                 | Anxiety or anxiety-related disorders<br>Anxiety | Ahmed 2007 [38]    | India                                   | 100                                | 24.6 (NR)            | 10.0                                          | PAS                                | NR |
|                                 |                                                 | Ajose 2014 [2]     | Nigeria                                 | 102                                | 35.9 (13.7)          | Yes, 18.6; borderline, 29.4                   | HADS                               | NR |
|                                 |                                                 | AlGhamdi 2010 [3]  | Saudi Arabia                            | 164                                | 27 (13)              | 57                                            | Self-report                        | NR |
|                                 |                                                 | AlShahwan 2015 [6] | Saudi Arabia                            | 64                                 | NR (adults)          | 26.6                                          | HADS                               | NR |
| Arýcan 2008 [7]                 |                                                 | Turkey             | 113                                     | Female, 29.2 (NR); male, 33.4 (NR) | 15.9                 | Diagnosed during screening                    | NR                                 |    |
| Chen 2020 [35]                  |                                                 | Taiwan             | 1432                                    | Median, 47.1                       | 12.2                 | Diagnosis on file                             | <0.001                             |    |
| Dabas 2020 [11]                 |                                                 | India              | 95                                      | NR (adults)                        | 13.7 <sup>c</sup>    | PRIME-MD PHQ                                  | NR                                 |    |
| Hamidizadeh 2020 [12]           |                                                 | Iran               | 100                                     | 34.5 (12.2)                        | 66.0                 | BAI                                           | 0.015                              |    |
| Karelson 2013 [14]              |                                                 | Estonia            | 54                                      | 36.6 (NR)                          | 22.2                 | ES-Q                                          | NR                                 |    |

| Psychosocial Comorbidity | Reference                 | Country | Number of Patients With Vitiligo | Age, Mean (SD), y           | Prevalence, % | Comorbidity Screening Tool <sup>a</sup> | P Value vs Healthy Controls |
|--------------------------|---------------------------|---------|----------------------------------|-----------------------------|---------------|-----------------------------------------|-----------------------------|
|                          | Morales-Sanchez 2017 [20] | Mexico  | 150                              | 38 (20)                     | 60.0          | BAI                                     | NR                          |
|                          | Raikhya 2017 [23]         | India   | 53                               | NR (adults)                 | 11.3          | Diagnosed during screening              | NR                          |
|                          | Sharma 2001 [29]          | India   | 30                               | NR (adults)                 | 3.3           | Diagnosed during screening              | NR                          |
|                          | Sorour 2017 [31]          | Egypt   | 108                              | NR (adults)                 | 31.5          | Diagnosed during screening              | NR                          |
|                          | Sukan 2007 [37]           | Turkey  | 50                               | 35.8 (12.6)                 | 6.0           | SCID-I                                  | 0.003                       |
|                          | Topal 2016 [32]           | Turkey  | 100                              | 35.4 (14.3)                 | 46.0          | Self-report                             | NR                          |
|                          | Tsintsadze 2015 [33]      | Georgia | 15                               | NR (adolescents and adults) | 66.7          | HADS                                    | NR                          |
| Agoraphobia              | Ahmed 2007 [38]           | India   | 100                              | 24.6 (NR)                   | 2.0           | PAS                                     | NR                          |
| GAD                      | Balaban 2011 [36]         | Turkey  | 42                               | 39.7 (12.9)                 | 4.8           | SCID-I                                  | NR                          |
|                          | Ucuz 2021 [41]            | Turkey  | 30                               | Mean (range), 12.3 (8–17)   | 10.0          | K-SADS-PL                               | <0.001                      |
| Panic disorder           | Dabas 2020 [11]           | India   | 95                               | NR (adults)                 | 7.4           | PRIME-MD PHQ                            | NR                          |
|                          | Karelson 2013 [14]        | Estonia | 54                               | 36.6 (NR)                   | 1.9           | ES-Q                                    | NR                          |
|                          | Ramakrishna 2014 [39]     | India   | 53                               | NR (adults)                 | 11.3          | Not specified                           | NR                          |
| Social phobia            | Ahmed 2007 [38]           | India   | 100                              | 24.6 (NR)                   | 8.0           | PAS                                     | NR                          |
|                          | Balaban 2011 [36]         | Turkey  | 42                               | 39.7 (12.9)                 | 2.4           | SCID-I                                  | NR                          |

| <b>Psychosocial Comorbidity</b> | <b>Reference</b>      | <b>Country</b>         | <b>Number of Patients With Vitiligo</b> | <b>Age, Mean (SD), y</b>                                      | <b>Prevalence, %</b>      | <b>Comorbidity Screening Tool<sup>a</sup></b> | <b>P Value vs Healthy Controls</b> |
|---------------------------------|-----------------------|------------------------|-----------------------------------------|---------------------------------------------------------------|---------------------------|-----------------------------------------------|------------------------------------|
|                                 | Karelson 2013 [14]    | Estonia                | 54                                      | 36.6 (NR)                                                     | 7.4                       | ES-Q                                          | NR                                 |
|                                 | Ramakrishna 2014 [39] | India                  | 53                                      | NR (adults)                                                   | 67.9                      | Not specified                                 | NR                                 |
|                                 | Sampogna 2008 [24]    | Italy                  | 181                                     | 35 (NR)                                                       | 28                        | Skindex-29                                    | NR                                 |
| Depression and anxiety          | Ahmed 2007 [38]       | India                  | 100                                     | 24.6 (NR)                                                     | 5                         | PAS                                           | NR                                 |
|                                 | Ajose 2014 [2]        | Nigeria                | 102                                     | 35.9 (13.7)                                                   | Yes, 4.9; borderline, 5.9 | HADS                                          | NR                                 |
|                                 | Tsintsadze 2015 [33]  | Georgia                | 15                                      | NR (adolescents and adults)                                   | 33.3                      | HADS                                          | NR                                 |
|                                 | Ucuz 2021 [41]        | Turkey                 | 30                                      | Mean (range), 12.3 (8–17)                                     | 10.0                      | K-SADS-PL                                     | <0.001                             |
| Stigma                          | Krüger 2015 [42]      | Germany                | 96                                      | Mean (range), 41.7 (18–67)                                    | 90.6                      | ACS                                           | NR                                 |
|                                 | Krüger 2014 [43]      | Germany, United States | 74                                      | Mean (range), children, 9.1 (7–12); adolescents, 14.5 (13–17) | 44.6–93.2                 | Self-report                                   | NR                                 |
|                                 | Porter 1987 [21]      | United States          | 326                                     | Median (range), 34 (4–79)                                     | 20–57                     | Self-report                                   | NR                                 |
|                                 | Porter 1979 [44]      | United States          | 62                                      | Mean (range), 39 (14–69)                                      | 22.6–72                   | Self-report                                   | NR                                 |
|                                 | Porter 1991 [45]      | United States          | 158                                     | Median (range), 38 (16–79)                                    | 100                       | Self-report                                   | NR                                 |
|                                 | Premkumar 2013 [46]   | India                  | 150                                     | NR (adolescents and adults)                                   | 17.3                      | Participation Scale                           | NR                                 |

| <b>Psychosocial Comorbidity</b> | <b>Reference</b>     | <b>Country</b> | <b>Number of Patients With Vitiligo</b> | <b>Age, Mean (SD), y</b> | <b>Prevalence, %</b> | <b>Comorbidity Screening Tool<sup>a</sup></b>    | <b>P Value vs Healthy Controls</b> |
|---------------------------------|----------------------|----------------|-----------------------------------------|--------------------------|----------------------|--------------------------------------------------|------------------------------------|
|                                 | Pun 2021 [22]        | Nepal          | 22                                      | 38.7 (3.2)               | 100                  | Self-report                                      | NR                                 |
|                                 | Thompson 2010 [47]   | United Kingdom | 7                                       | Range, 19-52             | 100                  | Self-report                                      | NR                                 |
| Adjustment disorders            |                      |                |                                         |                          |                      |                                                  |                                    |
| Adjustment disorder             | Mattoo 2001 [18]     | India          | 113                                     | 30.1 (12.5)              | 11.5                 | Diagnosed during screening                       | NR                                 |
|                                 | Mattoo 2002 [19]     | India          | 113                                     | 30.1 (12.5)              | 10.6                 | Diagnosed during screening                       | NR                                 |
| Helplessness                    | Pun 2021 [22]        | Nepal          | 22                                      | 38.7 (3.2)               | 9.1                  | VIS                                              | NR                                 |
| Hopelessness                    | Hamidzadeh 2020 [12] | Iran           | 100                                     | 34.5 (12.2)              | 60.0                 | Beck Hopelessness Scale                          | 0.006                              |
| Stress                          | Manolache 2007 [48]  | Romania        | 32                                      | Median (SD), 33.9 (17.8) | 65.6                 | Holmes and Rahe Social Readjustment Rating Scale | NR                                 |
|                                 | Salzer 1995 [49]     | Germany        | 117                                     | Mean (range), 40 (18–80) | 28.2                 | Freiburger Personality Inventory                 | NR                                 |
|                                 | Shaker 2016 [50]     | Egypt          | 30                                      | 31.6 (13.6)              | 93.9                 | Holmes and Rahe Social Readjustment Rating Scale | NR                                 |
| Unhappiness                     | Pun 2021 [22]        | Nepal          | 22                                      | 38.7 (3.2)               | 68.2                 | Self-report                                      | NR                                 |
| Worry about others' thoughts    | Anaba 2020 [51]      | Nigeria        | 29                                      | 40.1 (20.6)              | 40.9                 | VitiQoL                                          | NR                                 |
|                                 | Pun 2021 [22]        | Nepal          | 22                                      | 38.7 (3.2)               | 31.8                 | VitiQoL                                          | NR                                 |
| Worry about spread              | Agarwal 1998 [1]     | United Kingdom | 154                                     | 42 (18)                  | 4                    | Self-report                                      | NR                                 |
|                                 | Anaba 2020 [51]      | Nigeria        | 29                                      | 40.1 (20.6)              | 75.9                 | VitiQoL                                          | NR                                 |
|                                 | Kota 2019 [16]       | India          | 150                                     | NR (adults)              | 88.0                 | VIS-22                                           | NR                                 |

| <b>Psychosocial Comorbidity</b> | <b>Reference</b>       | <b>Country</b> | <b>Number of Patients With Vitiligo</b> | <b>Age, Mean (SD), y</b>           | <b>Prevalence, %</b> | <b>Comorbidity Screening Tool<sup>a</sup></b>    | <b>P Value vs Healthy Controls</b> |
|---------------------------------|------------------------|----------------|-----------------------------------------|------------------------------------|----------------------|--------------------------------------------------|------------------------------------|
|                                 | Porter 1987 [21]       | United States  | 326                                     | Median (range), 34 (4–79)          | 41                   | Self-report                                      | NR                                 |
|                                 | Pun 2021 [22]          | Nepal          | 22                                      | 38.7 (3.2)                         | 68.2                 | VIS                                              | NR                                 |
|                                 | Sampogna 2008 [24]     | Italy          | 181                                     | 35 (NR)                            | 60                   | VitiQoL                                          | NR                                 |
|                                 |                        |                |                                         |                                    |                      | Skindex-29                                       | NR                                 |
| Sleep disturbances              | Karelson 2013 [14]     | Estonia        | 54                                      | 36.6 (NR)                          | 29.6                 | ES-Q                                             | NR                                 |
|                                 | Manolache 2007 [48]    | Romania        | 32                                      | Median (SD), 33.9 (17.8)           | 6.3                  | Holmes and Rahe Social Readjustment Rating Scale | NR                                 |
|                                 | Mouzas 2008 [52]       | Greece         | 116                                     | 32.4 (9.1)                         | 26.7–56.0            | Unspecified inventory                            | ≤0.001                             |
|                                 | Papadopoulos 1998 [53] | United Kingdom | 73                                      | 38.0 (12.6)                        | 31                   | SRE                                              | NR                                 |
|                                 | Sangma 2015 [25]       | India          | 100                                     | 29.7 (7.0)                         | 89.0                 | DLQI                                             | NR                                 |
|                                 | Sharma 2001 [29]       | India          | 30                                      | NR (adults)                        | 20.0                 | GHQ-H                                            | NR                                 |
|                                 | Sorour 2017 [31]       | Egypt          | 108                                     | NR (adults)                        | 4.6                  | Diagnosed during screening                       | NR                                 |
| Behavioral impairment           |                        |                |                                         |                                    |                      |                                                  |                                    |
| ADHD                            | Ucuz 2021 [41]         | Turkey         | 30                                      | Mean (range), 12.3 (8-17)          | 20.0                 | K-SADS-PL                                        | <0.001                             |
| Binge-eating disorder           | Dabas 2020 [11]        | India          | 95                                      | NR (adults)                        | 7.4                  | PRIME-MD PHQ                                     | NR                                 |
| Obsessive disorders             | Arýcan 2008 [7]        | Turkey         | 113                                     | Female, 29.2 (NR); male, 33.4 (NR) | 19.5                 | Diagnosed during screening                       | NR                                 |
|                                 | Chen 2020 [35]         | Taiwan         | 1432                                    | Median, 47.1                       | 0.1                  | Diagnosis on file                                | NR                                 |

| <b>Psychosocial Comorbidity</b>              | <b>Reference</b>                 | <b>Country</b>           | <b>Number of Patients With Vitiligo</b> | <b>Age, Mean (SD), y</b>                 | <b>Prevalence, %</b>                     | <b>Comorbidity Screening Tool<sup>a</sup></b>    | <b>P Value vs Healthy Controls</b> |
|----------------------------------------------|----------------------------------|--------------------------|-----------------------------------------|------------------------------------------|------------------------------------------|--------------------------------------------------|------------------------------------|
| Social and situational avoidance/restriction | Raikhy 2017 [23]                 | India                    | 53                                      | NR (adults)                              | 7.6                                      | Diagnosed during screening                       | NR                                 |
|                                              | Ramakrishna 2014 [39]            | India                    | 53                                      | NR (adults)                              | 3.8                                      | Not specified                                    | NR                                 |
|                                              | Sorour 2017 [31]                 | Egypt                    | 108                                     | NR (adults)                              | 18.5                                     | Diagnosed during screening                       | NR                                 |
|                                              | Balaban 2011 [36]                | Turkey                   | 42                                      | 39.7 (12.9)                              | Mild, 71.4; moderate, 14.3; severe, 14.3 | SDS                                              | NR                                 |
|                                              | Bhatia 2019 [54]                 | France and United States | 442                                     | NR (all ages)                            | 29–76                                    | Self-report                                      | NR                                 |
|                                              | Kota 2019 [16]                   | India                    | 150                                     | NR (all ages)                            | 50.0                                     | VIS-22                                           | NR                                 |
|                                              | Krüger 2015 [42]                 | Germany                  | 96                                      | Mean (range), 41.7 (18–67)               | 66.7                                     | ACS                                              | NR                                 |
|                                              | Manolache 2007 [48]              | Romania                  | 32                                      | Median (SD), 33.9 (17.8)                 | 12.5                                     | Holmes and Rahe Social Readjustment Rating Scale | NR                                 |
|                                              | Pichaimuthu 2011 [55]            | India                    | 150                                     | 35.1 (14.7)                              | 17.3                                     | Participation Scale                              | NR                                 |
|                                              | Pun 2021 [22]                    | Nepal                    | 22                                      | 38.7 (3.2)                               | 22.7<br>18.2–40.9                        | VIS<br>VitiQoL                                   | NR<br>NR                           |
|                                              | Salzer 1995 [49]                 | Germany                  | 117                                     | Mean (range), 40 (18–80)                 | 27                                       | Freiburger Personality Inventory                 | NR                                 |
|                                              | Sawant 2019 [28]                 | India                    | 100                                     | Men, 35.78 (14.23); women, 36.88 (14.22) | 48.0                                     | Participation Scale                              | NR                                 |
|                                              | Self-consciousness Embarrassment | Anaba 2020 [51]          | Nigeria                                 | 29                                       | 40.1 (20.6)                              | 55.5                                             | VitiQoL                            |

| Psychosocial Comorbidity | Reference          | Country        | Number of Patients With Vitiligo | Age, Mean (SD), y          | Prevalence, %                      | Comorbidity Screening Tool <sup>a</sup> | P Value vs Healthy Controls |
|--------------------------|--------------------|----------------|----------------------------------|----------------------------|------------------------------------|-----------------------------------------|-----------------------------|
| Low self-esteem          | Porter 1987 [21]   | United States  | 326                              | Median (range), 34 (4–79)  | Acute and consistent, 32; mild, 27 | Self-report                             | NR                          |
|                          | Porter 1979 [44]   | United States  | 62                               | Mean (range), 39 (14–69)   | 66.7                               | Self-report                             | NR                          |
|                          | Porter 1990 [56]   | United States  | 158                              | Median (range), 38 (16–79) | 24–55                              | Self-report                             | NR                          |
|                          | Porter 1991 [45]   | United States  | 158                              | Median (range), 38 (16–79) | 66.7                               | Self-report                             | NR                          |
|                          | Pun 2021 [22]      | Nepal          | 22                               | 38.7 (3.2)                 | 31.8<br>27.3                       | VIS<br>VitiQoL                          | NR<br>NR                    |
|                          | Sampogna 2008 [24] | Italy          | 181                              | 35 (NR)                    | 34                                 | Skindex-29                              | NR                          |
|                          | Sarkar 2018 [26]   | India          | 61                               | 43.8 (12.5)                | 55.7                               | Skindex-61                              | <0.0001                     |
|                          | Chan 2013 [8]      | Singapore      | 222                              | 48.4 (14.9)                | 6.8                                | RSES                                    | NR                          |
|                          | Chan 2012 [9]      | Singapore      | 145                              | 47.4 (15.0)                | 6.2                                | RSES                                    | NR                          |
|                          | Pun 2021 [22]      | Nepal          | 22                               | 38.7 (3.2)                 | 72.7                               | Self-report                             | NR                          |
| Salzer 1995 [49]         | Germany            | 117            | Mean (range), 40 (18–80)         | 30                         | Freiburger Personality Inventory   | NR                                      |                             |
| Emotional impairment     | Agarwal 1998 [1]   | United Kingdom | 154                              | 42 (18)                    | 6                                  | Self-report                             | NR                          |
|                          | AlGhamdi 2010 [3]  | Saudi Arabia   | 164                              | 27 (13)                    | 39–59                              | IPQ                                     | NR                          |
|                          | Anaba 2020 [51]    | Nigeria        | 29                               | 40.1 (20.6)                | 55.2                               | VitiQoL                                 | NR                          |
|                          | Bae 2018 [57]      | South Korea    | 1123                             | 49.8 (15.2)                | Mild, 65.0; severe, 46.0           | Skindex-29                              | NR                          |
|                          | Chen 2020 [35]     | Taiwan         | 1432                             | Median, 47.1               | 23.1                               | Diagnosis on file                       | NR                          |
|                          | Porter 1987 [21]   | United States  | 326                              | Median (range), 34 (4–79)  | 32–47                              | Self-report                             | NR                          |

| <b>Psychosocial Comorbidity</b>                                   | <b>Reference</b>    | <b>Country</b> | <b>Number of Patients With Vitiligo</b> | <b>Age, Mean (SD), y</b>   | <b>Prevalence, %</b> | <b>Comorbidity Screening Tool<sup>a</sup></b> | <b>P Value vs Healthy Controls</b> |
|-------------------------------------------------------------------|---------------------|----------------|-----------------------------------------|----------------------------|----------------------|-----------------------------------------------|------------------------------------|
|                                                                   | Porter 1979 [44]    | United States  | 62                                      | Mean (range), 39 (14–69)   | 53.3                 | Self-report                                   | NR                                 |
|                                                                   | Porter 1991 [45]    | United States  | 158                                     | Median (range), 38 (16–79) | 7–36                 | Self-report                                   | NR                                 |
|                                                                   | Pun 2021 [22]       | Nepal          | 22                                      | 38.7 (3.2)                 | 18.2–36.4            | VitiQoL                                       | NR                                 |
|                                                                   | Salzer 1995 [49]    | Germany        | 117                                     | Mean (range), 40 (18–80)   | 32                   | Freiburger Personality Inventory              | NR                                 |
|                                                                   | Sarkar 2018 [26]    | India          | 61                                      | 43.8 (12.48)               | 24.6                 | Skindex-61                                    | 0.13                               |
| Cognitive impairment<br>Schizophrenia                             | Chen 2020 [35]      | Taiwan         | 1432                                    | Median, 47.1               | 0.3                  | Diagnosis on file                             | NR                                 |
|                                                                   | Raikhy 2017 [23]    | India          | 53                                      | NR (adults)                | 3.8                  | Diagnosed during screening                    | NR                                 |
| Unspecified                                                       | Sarkar 2018 [26]    | India          | 61                                      | 43.8 (12.5)                | 50.8                 | Skindex-61                                    | <0.0001                            |
| Relationship difficulties and sexual dysfunction<br>Relationships | Porter 1987 [21]    | United States  | 326                                     | Median (range), 34 (4–79)  | 23                   | Self-report                                   | NR                                 |
|                                                                   | Porter 1990 [56]    | United States  | 158                                     | Median (range), 38 (16–79) | 15                   | Self-report                                   | NR                                 |
|                                                                   | Pun 2021 [22]       | Nepal          | 22                                      | 38.7 (3.2)                 | 4.5                  | VIS                                           | NR                                 |
|                                                                   | Ahmed 2007 [38]     | India          | 100                                     | 24.6 (NR)                  | 81.8                 | Self-report                                   | NR                                 |
|                                                                   | Kim 2013 [58]       | South Korea    | 167                                     | 36.1 (NR)                  | 2.0                  | PAS                                           | NR                                 |
| Sexual                                                            | Manolache 2007 [48] | Romania        | 32                                      | Median (SD), 33.9 (17.8)   | 21.6                 | Self-report                                   | NR                                 |
|                                                                   |                     |                |                                         |                            | 3.1                  | Holmes and Rahe Social                        | NR                                 |

| Psychosocial Comorbidity | Reference              | Country        | Number of Patients With Vitiligo | Age, Mean (SD), y          | Prevalence, %                     | Comorbidity Screening Tool <sup>a</sup> | P Value vs Healthy Controls |
|--------------------------|------------------------|----------------|----------------------------------|----------------------------|-----------------------------------|-----------------------------------------|-----------------------------|
|                          |                        |                |                                  |                            |                                   | Readjustment Rating Scale               |                             |
|                          | Papadopoulos 1998 [53] | United Kingdom | 73                               | 38.0 (12.6)                | 16.4                              | SRE                                     | NR                          |
|                          | Porter 1979 [44]       | United States  | 62                               | Mean (range), 39 (14–69)   | 33.3                              | Self-report                             | NR                          |
|                          | Porter 1990 [56]       | United States  | 158                              | Median (range), 38 (16–79) | 10–23                             | Self-report                             | NR                          |
|                          | Sorour 2017 [31]       | Egypt          | 108                              | NR (adults)                | 48.2                              | Diagnosed during screening              | NR                          |
|                          | Sukan 2007 [37]        | Turkey         | 50                               | 35.8 (12.6)                | 36.0                              | ASEX                                    | 0.000                       |
| Alexithymia              | Dehghani 2017 [59]     | Iran           | 30                               | 31.6 (11.1)                | 46.7                              | TAS-20                                  | NR                          |
|                          | Maghami 2018 [60]      | Iran           | 52                               | NR (adults)                | Confirmed, 38.5; borderline, 27.0 | TAS-20                                  | 0.57                        |
|                          | Picardi 2003 [61]      | Italy          | 31                               | 31.9 (9.6)                 | Confirmed, 35.5; borderline, 32.3 | TAS-20                                  | NR                          |
|                          | Sampogna 2008 [24]     | Italy          | 181                              | 35 (NR)                    | Confirmed, 23.8; possible, 22.2   | TAS-20                                  | NR                          |
| Anger                    | Agarwal 1998 [1]       | United Kingdom | 154                              | 42 (18)                    | 14                                | Self-report                             | NR                          |
|                          | AlGhamdi 2010 [3]      | Saudi Arabia   | 164                              | 27 (13)                    | 34                                | IPQ                                     | NR                          |
|                          | Salzer 1995 [49]       | Germany        | 117                              | Mean (range), 40 (18-80)   | 32                                | Freiburger Personality Inventory        | NR                          |

| <b>Psychosocial Comorbidity</b> | <b>Reference</b>      | <b>Country</b> | <b>Number of Patients With Vitiligo</b> | <b>Age, Mean (SD), y</b>  | <b>Prevalence, %</b> | <b>Comorbidity Screening Tool<sup>a</sup></b> | <b>P Value vs Healthy Controls</b> |
|---------------------------------|-----------------------|----------------|-----------------------------------------|---------------------------|----------------------|-----------------------------------------------|------------------------------------|
|                                 | Sampogna 2008 [24]    | Italy          | 181                                     | 35 (NR)                   | 36.9                 | Skindex-29                                    | NR                                 |
|                                 | Sarkar 2018 [26]      | India          | 61                                      | 43.8 (12.5)               | 36.1                 | Skindex-61                                    | 0.11                               |
|                                 | Topal 2016 [32]       | Turkey         | 100                                     | 35.4 (14.3)               | 29.0                 | IPQ                                           | NR                                 |
| Suicidality Attempts            | Sharma 2001 [29]      | India          | 30                                      | NR (adults)               | 3.3                  | Diagnosed during screening                    | NR                                 |
|                                 | Sorour 2017 [31]      | Egypt          | 108                                     | NR                        | 3.7                  | Diagnosed during screening                    | NR                                 |
| Ideation                        | Kota 2019 [16]        | India          | 150                                     | NR (adults)               | 23.3                 | QIDS-SR-16                                    | NR                                 |
|                                 | Porter 1987 [21]      | United States  | 326                                     | Median (range), 34 (4–79) | 3                    | Self-report                                   | NR                                 |
|                                 | Pun 2021 [22]         | Nepal          | 22                                      | 38.7 (3.2)                | 4.5                  | VIS                                           | NR                                 |
|                                 | Sangma 2015 [25]      | India          | 100                                     | 29.7 (7.0)                | 8                    | HDRS                                          | NR                                 |
|                                 | Sharma 2001 [29]      | India          | 30                                      | NR (adults)               | 10.0                 | Diagnosed during screening                    | NR                                 |
|                                 | Sorour 2017 [31]      | Egypt          | 108                                     | NR (adults)               | 25.0                 | Diagnosed during screening                    | NR                                 |
| Unspecified                     | Ramakrishna 2014 [39] | India          | 53                                      | NR (adults)               | 28.3                 | Not specified                                 | NR                                 |
| Somatoform disorder             | Dabas 2020 [11]       | India          | 95                                      | NR (adults)               | 6.3                  | PRIME-MD PHQ                                  | NR                                 |
|                                 | Raikhy 2017 [23]      | India          | 53                                      | NR (adults)               | 9.4                  | Diagnosed during screening                    | NR                                 |
|                                 | Sharma 2001 [29]      | India          | 30                                      | NR (adults)               | 6.7                  | GHQ-H                                         | NR                                 |

| <b>Psychosocial Comorbidity</b> | <b>Reference</b>  | <b>Country</b> | <b>Number of Patients With Vitiligo</b> | <b>Age, Mean (SD), y</b> | <b>Prevalence, %</b> | <b>Comorbidity Screening Tool<sup>a</sup></b> | <b>P Value vs Healthy Controls</b> |
|---------------------------------|-------------------|----------------|-----------------------------------------|--------------------------|----------------------|-----------------------------------------------|------------------------------------|
| Alcohol dependence or abuse     | Balaban 2011 [36] | Turkey         | 42                                      | 39.7 (12.9)              | 2.4                  | SCID-I                                        | NR                                 |
|                                 | Dabas 2020 [11]   | India          | 95                                      | NR (adults)              | 6.3                  | PRIME-MD PHQ                                  | NR                                 |
|                                 | Raikhy 2017 [23]  | India          | 53                                      | NR (adults)              | 7.6                  | Diagnosed during screening                    | NR                                 |

ACS, Adjustment to Chronic Skin Disorders Questionnaire; ADHD, attention-deficit/hyperactivity disorder; ASEX, Arizona Sexual Experience Scale; BAI, Beck Anxiety Inventory; BDI, Beck Depression Inventory; CES-D, Center for Epidemiologic Studies Depression Scale; DLQI, Dermatology Life Quality Index; ES-Q, Emotional State Questionnaire; GAD, generalized anxiety disorder; GHQ-H, Hindi version of the General Health Questionnaire; HADS, Hospital Anxiety and Depression Scale; HDRS, Hamilton Depression Rating Scale; IPQ, Illness Perception Questionnaire; IQR, interquartile range; K-SADS-PL, Schedule for Affective Disorders and Schizophrenia for School Age Children-Present and Lifetime Version; MDD, major depressive disorder; NR, not reported; PAS, Psychiatric Assessment Schedule; PHQ-9, Patient Health Questionnaire-9; PRIME-MD PHQ, Primary Care Evaluation of Mental Disorders–Patient Health Questionnaire; QIDS-SR-16, Quick Inventory of Depressive Symptomatology–Self Report; RSES, Rosenberg Self-Esteem Scale; SCID-I, Structured Clinical Interview for DSM-IV Axis I Disorders; SDS, Sheehan Disability Scale; SRE, Schedule of Recent Experience; TAS-20, Toronto Alexithymia Scale-20; VIS, Vitiligo Impact Scale; VIS-22, Vitiligo Impact Scale 22; VitiQoL, Vitiligo-specific Quality of Life.

<sup>a</sup> Where “diagnosis on file” and “diagnosed during screening” are listed as the comorbidity screening tool, the article specified a formal diagnosis or provided diagnostic criteria/codes (ie, Diagnostic and Statistical Manual of Mental Disorders IV/5 or International Classification of Diseases 9/10), suggestive of a formal diagnosis.

<sup>b</sup> Includes MDD and other depressive disorders.

<sup>c</sup> Includes panic disorders and other anxiety disorders.

## References

1. Agarwal G. Vitiligo: an under-estimated problem. *Fam Pract.* 1998;15 suppl 1:S19-23.
2. Ajose FO, Parker RA, Merrall EL, Adewuya AO, Zachariah MP. Quantification and comparison of psychiatric distress in African patients with albinism and vitiligo: a 5-year prospective study. *J Eur Acad Dermatol Venereol.* 2014;28(7):925-32.
3. AlGhamdi KM. Beliefs and perceptions of Arab vitiligo patients regarding their condition. *Int J Dermatol.* 2010;49(10):1141-5.
4. Al-Harbi M. Prevalence of depression in vitiligo patients. *Skinmed.* 2013;11(6):327-30.
5. Alharbi MA. Identifying patients at higher risk of depression among patients with vitiligo at outpatient setting. *Mater Sociomed.* 2020;32(2):108-11.
6. AlShahwan MA. The prevalence of anxiety and depression in Arab dermatology patients. *J Cutan Med Surg.* 2015;19(3):297-303.
7. Arýcan Ö, Koç K, Ersoy L. Clinical characteristics in 113 Turkish vitiligo patients. *Acta Dermatovenerologica Alpina, Pannonica et Adriatica.* 2008;17(3):129-32.
8. Chan MF, Thng TG, Aw CW, Goh BK, Lee SM, Chua TL. Investigating factors associated with quality of life of vitiligo patients in Singapore. *Int J Nurs Pract.* 2013;19 suppl 3:3-10.
9. Chan MF, Chua TL, Goh BK, Aw CW, Thng TG, Lee SM. Investigating factors associated with depression of vitiligo patients in Singapore. *J Clin Nurs.* 2012;21(11-12):1614-21.
10. Choi S, Kim DY, Whang SH, Lee JH, Hann SK, Shin YJ. Quality of life and psychological adaptation of Korean adolescents with vitiligo. *J Eur Acad Dermatol Venereol.* 2010;24(5):524-9.
11. Dabas G, Vinay K, Parsad D, Kumar A, Kumaran MS. Psychological disturbances in patients with pigmentary disorders: a cross-sectional study. *J Eur Acad Dermatol Venereol.* 2020;34(2):392-9.
12. Hamidizadeh N, Ranjbar S, Ghanizadeh A, Parvizi MM, Jafari P, Handjani F. Evaluating prevalence of depression, anxiety and hopelessness in patients with vitiligo on an Iranian population. *Health Qual Life Outcomes.* 2020;18(1):20.

13. Henning SW, Jaishankar D, Barse LW, Dellacecca ER, Lancki N, Webb K et al. The relationship between stress and vitiligo: evaluating perceived stress and electronic medical record data. *PLoS One*. 2020;15(1):e0227909.
14. Karelson M, Silm H, Kingo K. Quality of life and emotional state in vitiligo in an Estonian sample: comparison with psoriasis and healthy controls. *Acta Derm Venereol*. 2013;93(4):446-50.
15. Kosaraju SK, Reddy KS, Vadlamani N, Sandhya L, Kalasapati L, Maganti S et al. Psychological morbidity among dermatological patients in a rural setting. *Indian J Dermatol*. 2015;60(6):635.
16. Kota RS, Vora RV, Varma JR, Kota SK, Patel TM, Ganjiwale J. Study on assessment of quality of life and depression in patients of vitiligo. *Indian Dermatol Online J*. 2019;10(2):153-7.
17. Kruger C, Smythe JW, Spencer JD, Hasse S, Panske A, Chiuchiarelli G et al. Significant immediate and long-term improvement in quality of life and disease coping in patients with vitiligo after group climatotherapy at the Dead Sea. *Acta Derm Venereol*. 2011;91(2):152-9.
18. Mattoo SK, Handa S, Kaur I, Gupta N, Malhotra R. Psychiatric morbidity in vitiligo and psoriasis: a comparative study from India. *J Dermatol*. 2001;28(8):424-32.
19. Mattoo SK, Handa S, Kaur I, Gupta N, Malhotra R. Psychiatric morbidity in vitiligo: prevalence and correlates in India. *J Eur Acad Dermatol Venereol*. 2002;16(6):573-8.
20. Morales-Sanchez MA, Vargas-Salinas M, Peralta-Pedrero ML, Olguin-Garcia MG, Jurado-Santa Cruz F. Impact of vitiligo on quality of life. *Actas Dermosifiliogr*. 2017;108(7):637-42.
21. Porter J, Beuf AH, Lerner A, Nordlund J. Response to cosmetic disfigurement: patients with vitiligo. *Cutis*. 1987;39(6):493-4.
22. Pun J, Randhawa A, Kumar A, Williams V. The impact of vitiligo on quality of life and psychosocial well-being in a Nepalese population. *Dermatol Clin*. 2021;39(1):117-27.
23. Raikhy S, Gautam S, Kanodia S. Pattern and prevalence of psychiatric disorders among patients attending dermatology OPD. *Asian J Psychiatr*. 2017;29:85-8.
24. Sampogna F, Raskovic D, Guerra L, Pedicelli C, Tabolli S, Leoni L et al. Identification of categories at risk for high quality of life impairment in patients with vitiligo. *Br J Dermatol*. 2008;159(2):351-9.

25. Sangma LN, Nath J, Bhagabati D. Quality of life and psychological morbidity in vitiligo patients: a study in a teaching hospital from north-East India. *Indian J Dermatol.* 2015;60(2):142-6.
26. Sarkar S, Sarkar T, Sarkar A, Das S. Vitiligo and psychiatric morbidity: a profile from a vitiligo clinic of a rural-based tertiary care center of Eastern India. *Indian J Dermatol.* 2018;63(4):281-4.
27. Sarma N, Chakraborty S, Poojary S, Shashi Kumar BM, Gupta LK, Budamakuntla L et al. A nationwide, multicentric case-control study on vitiligo (MEDEC-V) to elicit the magnitude and correlates. *Indian J Dermatol.* 2020;65(6):473-82.
28. Sawant NS, Vanjari NA, Khopkar U. Gender differences in depression, coping, stigma, and quality of life in patients of vitiligo. *Dermatol Res Pract.* 2019;2019:6879412.
29. Sharma N, Koranne RV, Singh RK. Psychiatric morbidity in psoriasis and vitiligo: a comparative study. *J Dermatol.* 2001;28(8):419-23.
30. Silpa-Archa N, Pruksaeakanan C, Angkoolpakdeekul N, Chaiyabutr C, Kulthanan K, Ratta-Apha W et al. Relationship between depression and quality of life among vitiligo patients: a self-assessment questionnaire-based study. *Clin Cosmet Investig Dermatol.* 2020;13:511-20.
31. Sorour F, Abdelmoaty A, Bahary MH, El Birqdar B. Psychiatric disorders associated with some chronic dermatologic diseases among a group of Egyptian dermatology outpatient clinic attendants. *J Egypt Womens Dermatol Soc.* 2017;14(1):31-6.
32. Topal IO, Duman H, Goncu OE, Durmuscan M, Gungor S, Ulkumen PK. Knowledge, beliefs, and perceptions of Turkish vitiligo patients regarding their condition. *An Bras Dermatol.* 2016;91(6):770-5.
33. Tsintsadze N, Beridze L, Tsintsadze N, Krichun Y, Tsivadze N, Tsintsadze M. Psychosomatic aspects in patients with dermatologic diseases. *Georgian Med News.* 2015(243):70-5.
34. Yamamoto Y, Tanioka M, Hayashino Y, Mishina H, Kato M, Fukuhara S et al. Application of a two-question screening instrument to detect depressive symptoms in patients with vitiligo: a pilot study. *J Am Acad Dermatol.* 2011;64(5):e69-70.
35. Chen CY, Wang WM, Chung CH, Tsao CH, Chien WC, Hung CT. Increased risk of psychiatric disorders in adult patients with vitiligo: a nationwide, population-based cohort study in Taiwan. *J Dermatol.* 2020;47(5):470-5.

36. Balaban ÖD, Atagün Mİ, Özgüven HD, Özsan HH. Psychiatric morbidity in patients with vitiligo. *Dusunen Adam*. 2011;24(4):306-13.
37. Sukan M, Maner F. The problems in sexual functions of vitiligo and chronic urticaria patients. *J Sex Marital Ther*. 2007;33(1):55-64.
38. Ahmed I, Ahmed S, Nasreen S. Frequency and pattern of psychiatric disorders in patients with vitiligo. *J Ayub Med Coll Abbottabad*. 2007;19(3):19-21.
39. Ramakrishna P, Rajni T. Psychiatric morbidity and quality of life in vitiligo patients. *Indian J Psychol Med*. 2014;36(3):302-3.
40. Vallerand IA, Lewinson RT, Parsons LM, Hardin J, Haber RM, Lowerison MW et al. Vitiligo and major depressive disorder: a bidirectional population-based cohort study. *J Am Acad Dermatol*. 2019;80(5):1371-9.
41. Ucuz I, Altunisik N, Sener S, Turkmen D, Kavuran NA, Marsak M et al. Quality of life, emotion dysregulation, attention deficit and psychiatric comorbidity in children and adolescents with vitiligo. *Clin Exp Dermatol*. 2021;46(3):510-5.
42. Kruger C, Schallreuter KU. Stigmatisation, avoidance behaviour and difficulties in coping are common among adult patients with vitiligo. *Acta Derm Venereol*. 2015;95(5):553-8.
43. Kruger C, Panske A, Schallreuter KU. Disease-related behavioral patterns and experiences affect quality of life in children and adolescents with vitiligo. *Int J Dermatol*. 2014;53(1):43-50.
44. Porter J, Beuf AH, Nordlund JJ, Lerner AB. Psychological reaction to chronic skin disorders: a study of patients with vitiligo. *Gen Hosp Psychiatry*. 1979;1(1):73-7.
45. Porter JR, Beuf AH. Racial variation in reaction to physical stigma: a study of degree of disturbance by vitiligo among black and white patients. *J Health Soc Behav*. 1991;32(2):192-204.
46. Premkumar R, Kar B, Rajan P, Richard J. Major precipitating factors for stigma among stigmatized vitiligo and psoriasis patients with brown-black skin shades. *Indian J Dermatol Venereol Leprol*. 2013;79(5):703-5.
47. Thompson AR, Clarke SA, Newell RJ, Gawkrödger DJ, Appearance Research Collaboration. Vitiligo linked to stigmatization in British South Asian women: a qualitative study of the experiences of living with vitiligo. *Br J Dermatol*. 2010;163(3):481-6.
48. Manolache L, Benea V. Stress in patients with alopecia areata and vitiligo. *J Eur Acad Dermatol Venereol*. 2007;21(7):921-8.

49. Salzer BA, Schallreuter KU. Investigation of the personality structure in patients with vitiligo and a possible association with impaired catecholamine metabolism. *Dermatology*. 1995;190(2):109-15.
50. Shaker OG, Eltahlawi SM, Tawfic SO, Eltawdy AM, Bedair NI. Corticotropin-releasing hormone (CRH) and CRH receptor 1 gene expression in vitiligo. *Clin Exp Dermatol*. 2016;41(7):734-40.
51. Anaba EL, Oaku RI. Prospective cross-sectional study of quality of life of vitiligo patients using a vitiligo specific quality of life instrument. *West Afr J Med*. 2020;37(7):745-9.
52. Mouzas O, Angelopoulos N, Papaliagka M, Tsogas P. Increased frequency of self-reported parasomnias in patients suffering from vitiligo. *Eur J Dermatol*. 2008;18(2):165-8.
53. Papadopoulos L, Bor R, Legg C, Hawk JL. Impact of life events on the onset of vitiligo in adults: preliminary evidence for a psychological dimension in aetiology. *Clin Exp Dermatol*. 1998;23(6):243-8.
54. Bhatia B, Kechichian E, Eleftheriadou V, Castelneau JP, Seite S, Meurant JM et al. Habits and risk perception associated with sun exposure in vitiligo patients according to their participation in a patients' organization. *J Eur Acad Dermatol Venereol*. 2019;33(3):e100-e3.
55. Pichaimuthu R, Ramaswamy P, Bikash K, Joseph R. A measurement of the stigma among vitiligo and psoriasis patients in India. *Indian J Dermatol Venereol Leprol*. 2011;77(3):300-6.
56. Porter JR, Beuf AH, Lerner AB, Nordlund JJ. The effect of vitiligo on sexual relationships. *J Am Acad Dermatol*. 1990;22(2 Pt 1):221-2.
57. Bae JM, Lee SC, Kim TH, Yeom SD, Shin JH, Lee WJ et al. Factors affecting quality of life in patients with vitiligo: a nationwide study. *Br J Dermatol*. 2018;178(1):238-44.
58. Kim DY, Lee J, Oh SH, Hann SK, Shin YJ. Impact of genital involvement on the sexual lives of vitiligo patients. *J Dermatol*. 2013;40(12):1065-7.
59. Dehghani F, Dehghani F, Kafaie P, Taghizadeh MR. Alexithymia in different dermatologic patients. *Asian J Psychiatr*. 2017;25:42-5.
60. Maghami Z, Sepaskhah M, Sarani EM, Bagheri Z, Maghami M. Alexithymia in vitiligo patients: a case-control study. *Iran J Dermatol*. 2018;21(4):138-41.

61. Picardi A, Pasquini P, Cattaruzza MS, Gaetano P, Melchi CF, Baliva G et al. Stressful life events, social support, attachment security and alexithymia in vitiligo. A case-control study. *Psychother Psychosom.* 2003;72(3):150-8.
